# Supplementary material
Source: MDPI journal article supplement (https://www.mdpi.com/2072-4292/15/9/2442)
Supplement: s1 [file s1]

**Supplementary Materials:**

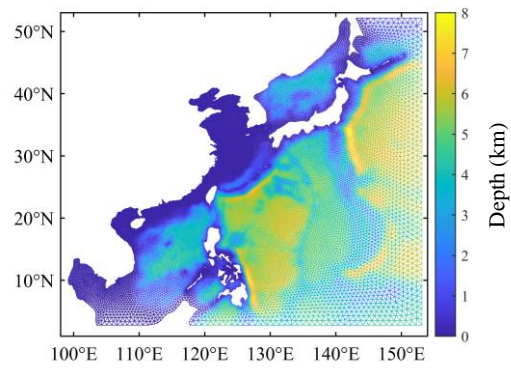

**Figure S1.** The computational grid of the model domain, shading indicating water depth.
